1 **Molluscan dorsal-ventral patterning relying on *bmp2/4* and**  
2 ***chordin* provides insights into spiralian development and**  
3 **bilaterian evolution**

4 Sujian Tan<sup>a,b,c1</sup>, Pin Huan<sup>a,b,c1</sup>, Baozhong Liu<sup>a,b,c2</sup>

5 *a, CAS and Shandong Province Key Laboratory of Experimental Marine Biology,*  
6 *Institute of Oceanology, Chinese Academy of Sciences, 266071, Qingdao, China;*

7 *b, Laboratory for Marine Biology and Biotechnology, Qingdao National Laboratory*  
8 *for Marine Science and Technology, 266000, Qingdao, China;*

9 *c, Center for Ocean Mega-Science, Chinese Academy of Sciences, 266071, Qingdao,*  
10 *China;*

11

12 <sup>1</sup>: These authors contributed equally to this work.

13 <sup>2</sup>: Corresponding author: Baozhong Liu

14 Key Laboratory of Experimental Marine Biology,

15 Institute of Oceanology, Chinese Academy of Sciences,

16 7 Nanhai Road, Qingdao, 266071, China

17 Email: bzliu@qdio.ac.cn

18 Tel.: +86-532-82898696

19 Fax: +86-532-82898578

20

21 **Abstract**

22       Although a conserved mechanism relying on *bmp2/4* and *chordin* is suggested in  
23 animal dorsal-ventral (DV) patterning, this mechanism has not been reported in  
24 spiralian, one of the three major clades of bilaterians. Studies on limited spiralian  
25 representatives have suggested markedly diverse DV patterning mechanisms, a  
26 considerable amount of which no longer deploy BMP signaling. Here, we showed that  
27 *bmp2/4* and *chordin* regulated DV patterning in the mollusk *Lottia goshimai*, which  
28 was predicted in spiralian but not reported before. In the context of the diverse  
29 reports in spiralian, it conversely represents a relatively unusual case. We then  
30 showed that *bmp2/4* and *chordin* coordinated to mediate signaling from the  
31 D-quadrant organizer to induce the DV axis, among which *chordin* transferred  
32 breakdown-of-symmetry information. Further investigations on the *L. goshimai*  
33 embryos with influenced DV patterning suggested roles of BMP signaling in  
34 regulating the localization of the blastopore and the organization of the nervous  
35 system, indicating a cooption of DV patterning and the transition of these key  
36 characteristics at the origin of bilaterians. These findings provide insights into the  
37 evolution of animal DV patterning, the unique development mode of spiralian driven  
38 by the D-quadrant organizer, and the evolution of bilaterian body plans.

39 **Keywords:** Dorsal-ventral, mollusk, organizer, BMP, *chordin*

40

41 The existence of a dorsal-ventral (DV) axis is a key characteristic in Bilateria.  
42 Generally, a conserved molecular logic, namely, the BMP ligand *bmp2/4* and its  
43 antagonist *chordin*, patterns the DV axis of bilaterians (1-6). It has been suggested  
44 that these two genes even pattern a body axis in nonbilaterian animal lineages (7, 8),  
45 indicating broad conservation. However, despite such conservation, the DV patterning  
46 mechanism exhibits a considerable degree of variation (9). In some cases, DV  
47 patterning no longer depends on *bmp2/4* and *chordin* (e.g., nematodes and ascidians  
48 (10, 11)). In two of the three major bilaterian clades, Ecdysozoa and Deuterostomia,  
49 such exceptional cases are considered lineage-specific characters since extensive  
50 evidence reveals *bmp2/4-chordin*-dependent mechanisms in their relatives (e.g.,  
51 insects and vertebrates (9, 12)).

52 The situation in the other bilaterian clade, Spiralia, is very different. Unlike those  
53 in ecdysozoans and deuterostomes, the molecular mechanisms of spiralian DV  
54 patterning remain largely elusive. Moreover, current studies on several representative  
55 species have revealed quite diverse DV patterning mechanisms. These spiralian  
56 could use other BMP molecules (the leech annelid *Helobdella robusta*) (13) or even  
57 do not employ BMP signaling in DV patterning (the annelids *Capitella teleta*,  
58 *Chaetopterus pergamentaceus* and the mollusk *Crepidula fornicata*) (14-18). The  
59 roles of *bmp2/4* in DV patterning were proven in two spiralian (the platyhelminth  
60 *Dugesia japonica* and the mollusk *Tritia obsoleta*) (19, 20), but it is unknown whether  
61 *bmp2/4* coordinates with *chordin* to induce correct DV patterning (as seen in most  
62 nonspiralian animals (9, 12)). This issue is important since *chordin* is suggested to be  
63 crucial in DV patterning (9), and this gene might have been lost from particular  
64 spiralian lineages (e.g., platyhelminths) (21). Together, although the ancestral  
65 *bmp2/4-chordin*-dependent DV patterning mechanism has been generally accepted for  
66 bilaterians (22), studies on six species spanning three spiralian phyla did not reveal  
67 such a mechanism (Fig. 1a).

68 Despite the suggested diversity at the molecular level, spiralian DV patterning

69 actually shows considerable conservation at the cellular level. In spiralian lineages  
70 such as annelids, mollusks and nemertean, the DV axis is induced by a D-quadrant  
71 organizer, referring to a special blastomere that regulates the development of the  
72 whole embryo (e.g., 3D or 4d, according to the nomenclature for describing spiral  
73 cleavage; see Fig. 1b and c) (23-25). In fact, the involvement of the D-quadrant  
74 organizer, in parallel with several other characteristics conserved in this clade but  
75 infrequently observed in other clades (e.g., spiral cleavage), is suggested to be the  
76 most important characteristic comprising the unique developmental mode of  
77 spiralian (23, 26-29). Although the developmental functions of spiralian D-quadrant  
78 organizer have been well determined, only limited knowledge is known regarding  
79 how it functions at the molecular level (30-33). In this context, investigating the  
80 molecular mechanisms of DV patterning would be an essential aspect to decipher the  
81 organizer function for spiralian, given the conserved role of organizer in inducing the  
82 DV axis.

83 Interestingly, a link was recently established between organizer and the DV  
84 patterning gene *bmp2/4*. A pioneering report proved that *bmp2/4* mediated organizer  
85 signaling and regulated DV patterning in the gastropod mollusk *Tritia* (20), explaining  
86 the conserved organizer function to induce DV patterning. Despite this essential  
87 process, open questions still exist. First, it is unknown whether such  
88 *bmp2/4*-dependent organizer function also exists in other spiralian lineages.  
89 Investigations on the prevalence of such a mechanism are necessary given the  
90 suggested diversity in spiralian DV patterning mechanisms at the molecular level, as  
91 mentioned above. Moreover, the dynamics of organizer signaling could differ  
92 significantly between unequal cleavers and equal cleavers (even from the same class,  
93 e.g., the snail *Tritia* and the limpet *Tectura*) (30, 31), adding to the question of  
94 whether they would utilize the same molecule to execute organizer function. Second,  
95 and more importantly, it should be explored whether a BMP antagonist is involved in  
96 organizer function. This question should be clarified since the crucial node in DV

97 patterning (i.e., organizer function) is not the BMP ligand itself but the gradient of  
98 BMP signaling along the presumed DV axis (12). Such a spatial distribution of BMP  
99 signaling is largely determined by extracellular BMP regulators such as *chordin* (12,  
100 34). In fact, the most important gene in DV patterning is proposed to be *chordin* but  
101 not *bmp2/4*. Restricted *chordin* expression is suggested to be sufficient to determine a  
102 BMP signaling gradient irrespective of the expression patterns of *bmp2/4* (9). Thus,  
103 despite knowing the involvement of *bmp2/4* in organizer function (in *Tritia*, still  
104 requiring investigations in additional species), a key question that follows is whether  
105 and how the organizer induces the BMP signaling gradient. Given the conserved roles  
106 of *chordin* as a major BMP antagonist gene in animal DV patterning, this gene could  
107 be the primary candidate to address this issue.

108 Mollusks emerge as ideal systems to clarify the abovementioned questions, i.e.,  
109 whether *bmp2/4* and *chordin* function in DV patterning of spiralian and the  
110 relationship between the two genes and the D-quadrant organizer. The organizer  
111 function to induce the DV axis has been well investigated in mollusks (35-37).  
112 Although the roles of BMP signaling in DV patterning have not been revealed in  
113 *Crepidula* (14), they have been demonstrated in *Tritia* (20). Our results using a small  
114 molecule BMP inhibitor also support this notion (in the bivalve *Crassostrea gigas*)  
115 (38). Moreover, unlike some spiralian that likely lack the *chordin* gene, the gene was  
116 identified in mollusks (21). We further showed that *bmp2/4* and *chordin* were  
117 expressed on opposite sides along the DV axis of the *Crassostrea* embryo, indicating  
118 roles in DV patterning (39). Here, we investigated the roles of *bmp2/4* and *chordin* in  
119 the gastropod mollusk *Lottia goshimai*. We confirmed that the two genes both  
120 regulated DV patterning and participated in organizer function. By examining  
121 embryos with influenced DV patterning, we further revealed evidence suggesting the  
122 profound developmental effects of stereotype cleavage and the regulatory roles of  
123 BMP signaling in the localization of blastopore and the organization of the nervous  
124 system. These findings provide insights into the unique developmental mode of

125 spiralian and the evolution of bilaterian body plans.

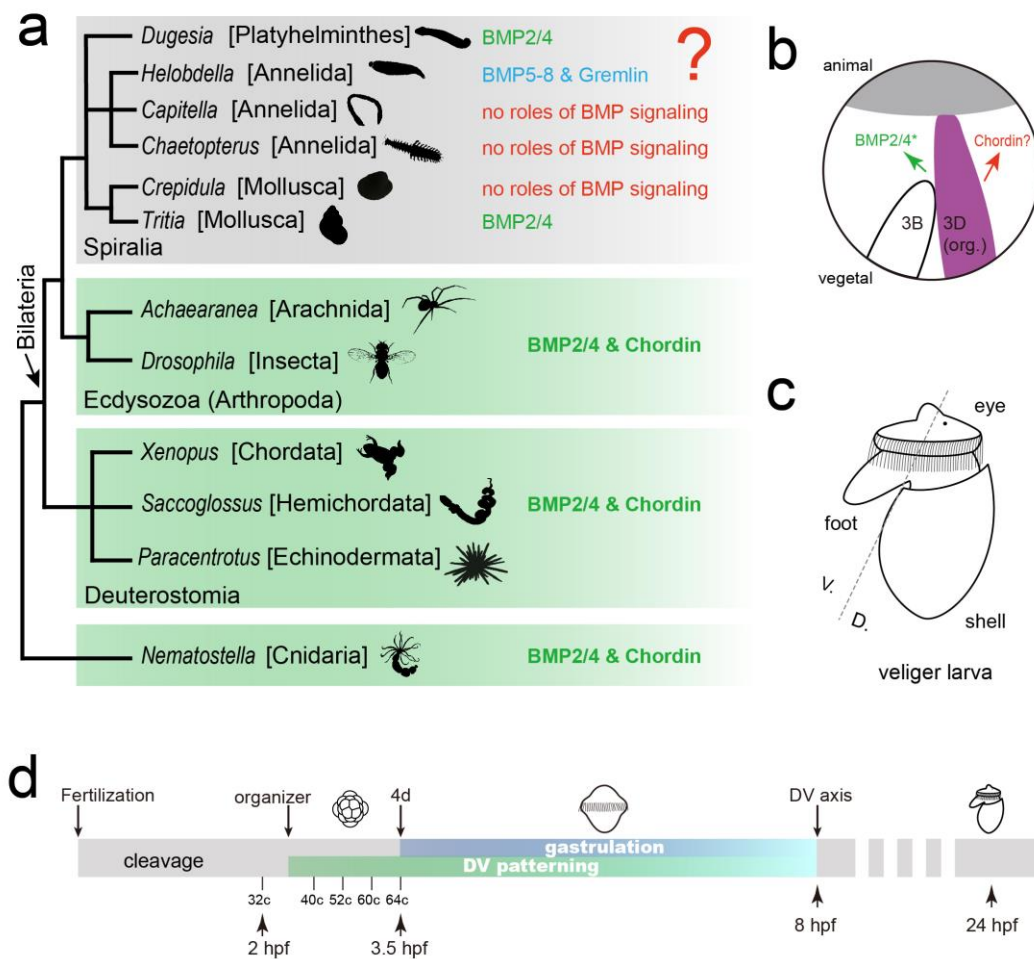

126

127 **Fig. 1 Mollusks represent ideal systems to understand the evolution of animal DV patterning**

128 **and spiralian organizer function. a. Conserved roles of *bmp2/4* and *chordin* in animal body**

129 **patterning.** In most major animal clades, *bmp2/4* and *chordin* determine a body axis (it is the DV

130 axis for bilaterians). For spiralian, however, the knowledge is elusive, and some results argue

131 against this conserved mechanism (blue and red letters). The diagrams of representative animals

132 are derived from PhyloPic (<http://phylopic.org/>) and Wikipedia (<https://www.wikipedia.org>)

133 licensed under CC BY 3.0. **b-c. Unique spiralian developmental mode relying on a**

134 **D-quadrant organizer.** Panel **b** shows that after its formation, the organizer (3D) activates BMP

135 signaling by regulating *bmp2/4* (green letters); however, whether *chordin* is involved in this

136 process remains unknown (red letters). The asterisk indicates that this mechanism requires

137 certifications in more species. Panel **c** shows a veliger larva of gastropod mollusks, and the

138 processes regulated by the organizer are highlighted: DV patterning (generally indicated by the

139 dashed line) and the formation of marked larval organs. **d. Early development of the gastropod**  
140 **mollusk *L. goshimai* (at 25 °C) emphasizing DV patterning events.** Organizer formation at the  
141 middle 32-cell (32c) stage marks the beginning of DV patterning, which is largely coupled with  
142 gastrulation since the formation of the 4d blastomere at the 64-cell stage. A DV axis was well  
143 established at 8 hpf, and a characteristic veliger larva is developed at approximately 24 hpf.

## 144 **Results**

145 *bmp2/4* and *chordin* mediate organizer signaling and determine the BMP signaling  
146 gradient

147 Both *bmp2/4* and *chordin* were retrieved from the developmental transcriptome  
148 of *L. goshimai*. Given that molluscan DV patterning relies on the D-quadrant  
149 organizer, we first investigated the expression of *bmp2/4* and *chordin* around the time  
150 of organizer formation (from the 16-cell to 64-cell stage; see supplemental text for  
151 details about the *L. goshimai* organizer (3D)). At the same time, the dynamics of BMP  
152 signaling were explored by tracing the key signal transducer phosphorylated  
153 Smad1/5/8 (pSmad1/5/8). During the period investigated, *bmp2/4* was expressed in a  
154 generally radial pattern with minor changes (supplemental Fig. S2a-d). In contrast, we  
155 found a strong correlation among *chordin* mRNA expression, BMP signaling and the  
156 organizer (Fig. 2a-h and supplemental Fig. S2). In brief, sequential developmental  
157 events were observed in this period: 1) organizer formation (32-cell stage), 2)  
158 activation of universal BMP signaling (late 32-cell stage, Fig. 2f), 3) transition of  
159 *chordin* expression into an asymmetrical pattern (32-to-40-cell stage, Fig. 2c), and 4)  
160 transition of BMP signaling into an asymmetrical pattern (52-/60-cell stage, Fig. 2h).  
161 In the 60-cell embryo, the cells adjacent to the organizer showed strong BMP  
162 signaling, while only weak signaling was detected in the cells distal to the organizer  
163 (Fig. 2h and supplemental Fig. S2). This distribution pattern is comparable to the  
164 BMP signaling gradient along the DV axis in many animals (e.g., *Drosophila* and sea  
165 urchin) (40, 41); we thus refer to it as the BMP signaling gradient, although it does  
166 not exhibit an exact gradient pattern likely related to the small cell numbers and large



167 cell volumes in *L. goshimai* embryos. Since the direction of this gradient was across  
 168 the 3D and 3B blastomeres (Fig. 2h) that generally coincided with the presumptive  
 169 DV axis (23, 27), this BMP signaling gradient marked a molecular DV axis prior to  
 170 the morphologically detectable DV axis.

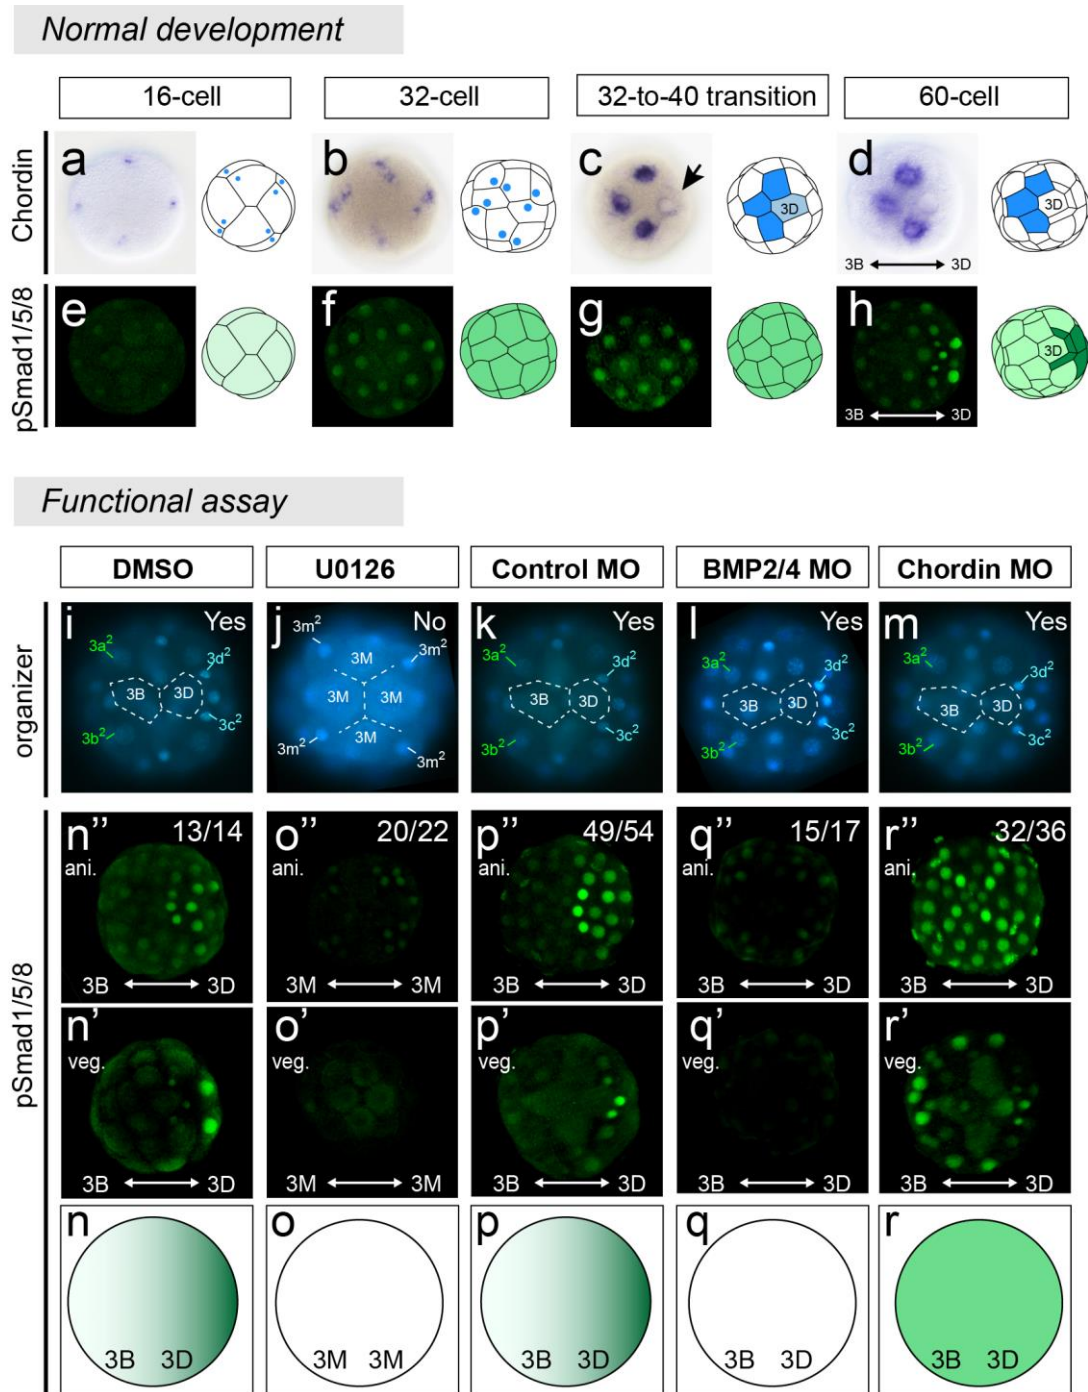

171

172 **Fig. 2** Regulatory relationships among the organizer, *bmp2/4* and *chordin*. **a-h**. Vegetal views,  
 173 *chordin* expression (**a-d**) and the state of BMP signaling that is indicated by phosphorylated



174 Smad1/5/8 (pSmad1/5/8) staining (**e-h**, confocal projections) from the 16- to 60-cell stage. The  
175 arrow in **c** indicates weakened *chordin* expression in the organizer (3D) at the late 32-cell stage.  
176 More details are provided in supplemental Fig. S2. **i-r**, the states of organizer (**i-m**) and BMP  
177 signaling (**n-r**) under different manipulations, all samples at the 60- or 63-cell stage. In **i-m**, the  
178 organizer is identifiable based on the characteristic 4-cell arrangement at the vegetal pole (see  
179 supplemental Fig. S1a), and whether an organizer was formed is indicated by “yes” or “no” in the  
180 panels. **n-r**. Diagrams showing pSmad1/5/8 staining along the 3B-3D axis (lateral views with the  
181 animal pole to the top). Both animal (ani., **n'-r'**) and vegetal (veg., **n''-r''**) views are shown.

182 The correlations among organizer, *chordin* expression and BMP signaling  
183 suggest regulatory relationships. We first confirmed that organizer formation triggered  
184 BMP signaling. When organizer formation was inhibited by the MAPK inhibitor  
185 U0126 (as described previously (30)) (Fig. 2j), the activation of BMP signaling was  
186 prevented (Fig. 2o). We then found that such activation of BMP signaling was mostly  
187 mediated by *bmp2/4* because injecting an antisense *bmp2/4* morpholino (MO) largely  
188 eliminated pSmad1/5/8 staining (Fig. 2q), while it did not influence organizer  
189 formation (Fig. 2l). The regulation of *bmp2/4* function by the organizer should be at  
190 the posttranscriptional level, since no significant change in *bmp2/4* mRNA expression  
191 was detected before and after organizer formation (supplemental Fig. S2a-d) or after  
192 U0126 treatment (supplemental Fig. S3h). However, the BMP signaling activated by  
193 the organizer only showed a universal distribution. We revealed that *chordin* was  
194 required to transit this universal distribution in a gradient manner. When *chordin* was  
195 inhibited by injecting an antisense MO, no gradient formed, and universal BMP  
196 signaling was sustained in subsequent developmental stages (till at least 64-cell stage,  
197 Fig. 2r), despite the normally formed organizer (Fig. 2m). We found that *chordin*  
198 expression was also regulated by the organizer. When organizer formation was  
199 inhibited, symmetrical *chordin* expression was no longer interrupted (supplemental  
200 Fig. S3).

201 Based on these results, we conclude the regulatory relationships among organizer,

202 *bmp2/4*, *chordin*, and BMP signaling in *L. goshimai* (Fig. 3). In brief, after its  
 203 formation, the organizer triggers *bmp2/4* (green arrows in Fig. 3b), which induces  
 204 universal BMP signaling activities (Fig. 3c). Shortly afterwards, the organizer  
 205 regulates *chordin* expression to become an asymmetrical pattern, which modulates  
 206 BMP signaling to form a gradient along the presumptive DV axis (Fig. 3d). Taken  
 207 together, under the regulation of the organizer, *bmp2/4* and *chordin* coordinate to  
 208 generate the correct BMP signaling gradient: *bmp2/4* activates signaling, and *chordin*  
 209 determines the spatial distribution (gradient) of signaling. From this point of view,  
 210 *chordin* is the key molecule to transfer the breakdown-of-symmetry signal from the  
 211 organizer to form the secondary body axis.

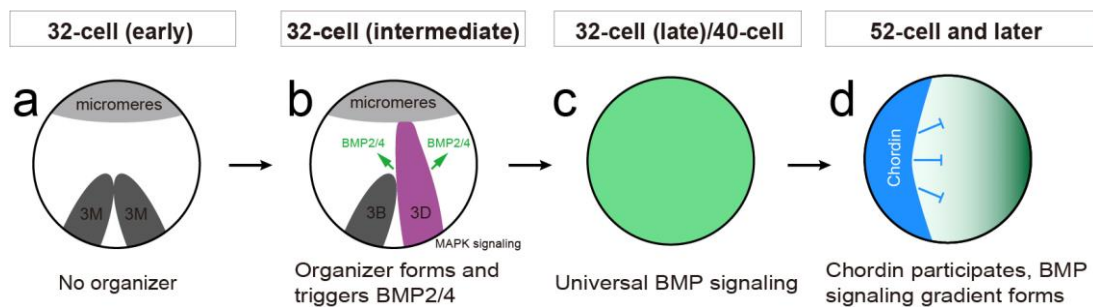

212

213 **Fig. 3 A hypothesis assuming regulatory relationships among organizer, *bmp2/4* and *chordin*.**

214 *bmp2/4* and *chordin* coordinate to generate the correct BMP signaling gradient to regulate DV  
 215 patterning, which was regulated by the organizer. When the 32-cell embryo initially forms, the  
 216 four macromeres (3M) are equivalent (a). One of them is subsequently induced to be the organizer  
 217 (3D) due to the establishment of direct contacts with micromeres at the animal pole (42); MAPK  
 218 signaling is then activated in this blastomere (30) (b). The organizer triggers *bmp2/4* (green arrows  
 219 in b), which induces universal BMP signaling activities (c), and then it also regulates *chordin*  
 220 expression to further transform BMP signaling into a gradient pattern (d). See other information in  
 221 the text.

222 *Normal DV patterning and expression of bmp2/4 and chordin*

223 Since the formation of the BMP signaling gradient, DV patterning of *L. goshimai*  
 224 began, which was largely coupled with the characteristic epibolic gastrulation in this  
 225 gastropod lineage (e.g., *Patella* (43, 44)) (Fig. 1d). A DV axis was well established at

226 8 hpf, reflected by the development of a shell field on the dorsal side and that of the  
 227 ventral plate and blastopore on the ventral side (Fig. 4a-j). Since these structures were  
 228 morphologically detectable at relatively late developmental stages, we investigated  
 229 the expression of several marker genes to explore the details of *L. goshimai* DV  
 230 patterning. The expression of blastopore marker genes (*brachyury* and *foxa*) was  
 231 asymmetrical along the DV (3B-3D) axis since the very beginning of DV patterning  
 232 (the 60-cell stage, ~3.2 hpf) (supplemental Fig. S4a-c). However, given that the  
 233 blastopore only represented a small portion of embryonic cells (Fig. 4h-j), we focused  
 234 on the shell field and the ventral plate that occupied most of the area of the  
 235 dorsal/ventral surface in the 8-hpf embryo (Fig. 4b-g).

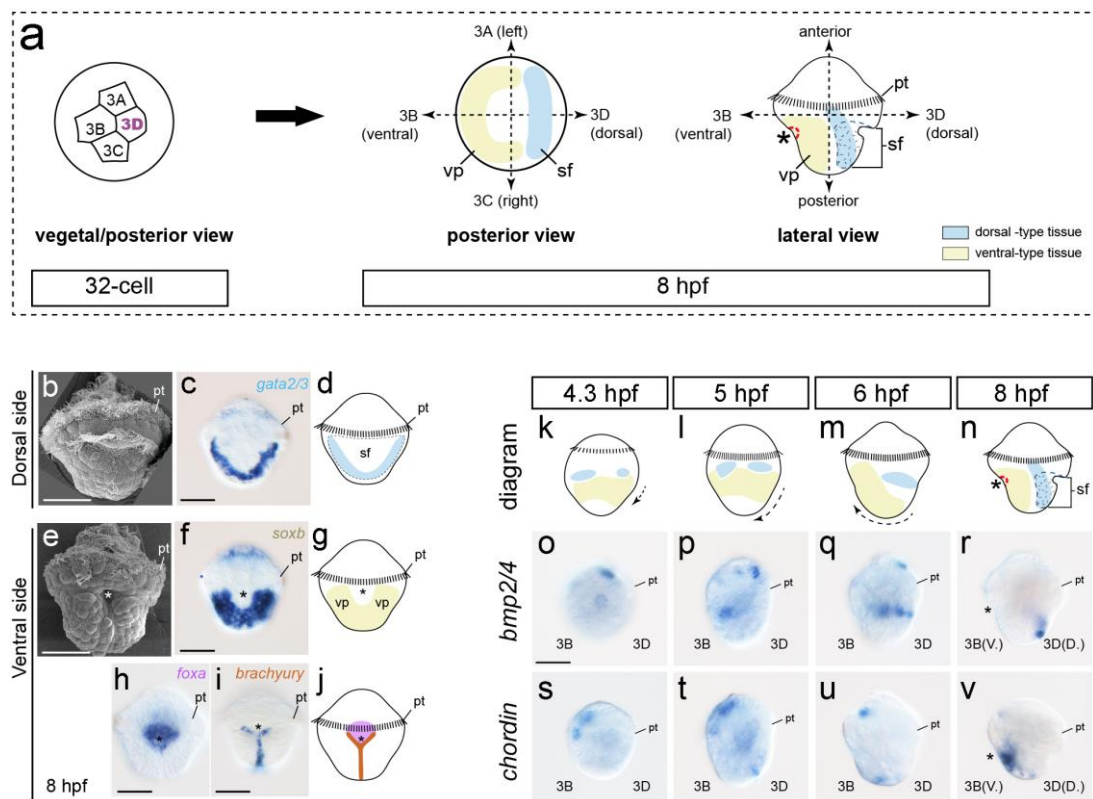

236

237 **Fig. 4 Normal DV patterning of *L. goshimai* and *bmp2/4* and *chordin* expression during this**  
 238 **period.** The diagrams in **a** show that the DV axis at 8 hpf corresponds to the 3B-3D axis at the  
 239 32-cell stage. **b-j**. Morphological characters of the 8-hpf embryos. On the dorsal side, a shell field  
 240 (sf) is discriminable, the out edge of which expresses the marker gene *gata2/3* (**b-d**). On the  
 241 ventral side (**e**), two structures are developed, including the ventral plate (vp) expressing *soxb* (**f**  
 242 and **g**) and the blastopore (asterisks) marked by *foxa* expression as well as a part of *brachyury*

243 expression (**h-j**). **k-v**. Normal expression of *bmp2/4* and *chordin* during DV patterning, lateral  
244 views anterior to the top. Diagrams in **k-n** show the movements of dorsal- and ventral-type tissues  
245 during DV patterning based on the dynamics of *gata2/3* and *soxb* expression (supplemental Fig.  
246 S4). The asterisks indicate the blastopore. pt, prototroch. Bars represent 50  $\mu$ m.

247 Two marker genes were investigated, including *gata2/3*, which was expressed in  
248 the outer edge of the shell field (as in another mollusk (45), Fig. 4c), and *soxb*, which  
249 was universally expressed in the ventral plate (46) (Fig. 4f). Expression of both genes  
250 indicated that at the initial phase of DV patterning (4.3-5 hpf), the anlagen of the shell  
251 field and ventral plate were aligned generally along the anterior-posterior (AP) axis  
252 (Fig. 4k, l and supplemental Fig. S4d-i), themselves organized in almost circular  
253 patterns (supplemental Fig. S4d'-i'). In subsequent development, the two tissues  
254 moved with the epibolic gastrulation and were ultimately located dorsally and  
255 ventrally at 8 hpf (Fig. 4k-n and supplemental Fig. S4j-o). During this period,  
256 posttrochal expression of *bmp2/4* and *chordin* correlated with the dynamics of the two  
257 tissues (Fig. 4o-v), and they were also distributed on the dorsal or ventral side at 8 hpf  
258 (Fig. 4r and v). This correlation indicates the roles of the two genes in DV patterning.

#### 259 *Radialized early development: DV patterning relying on bmp2/4 and chordin*

260 When inhibiting either *bmp2/4* or *chordin* by injection with specific MOs, DV  
261 patterning of *L. goshimai* was largely inhibited. As shown in Fig. 5, at 6 hpf,  
262 compared to the asymmetrical gene expression in normal embryos (*gata2/3*, *soxb*,  
263 *bmp2/4* and *chordin*), the embryos with *bmp2/4* or *chordin* knockdown showed  
264 generally radial expression (Fig. 5f-i, k-n) (despite significant differences between the  
265 two phenotypes, see more details in supplemental Fig. S5). Treatment of early  
266 embryos with 0.5  $\mu$ g/ml recombinant human BMP4 protein (rhBMP4) also generated  
267 a similar radialized phenotype (supplemental Fig. S6h-m). The absence of a DV axis  
268 in these radialized phenotypes suggests that the DV patterning of *L. goshimai* was  
269 inhibited when *bmp2/4* or *chordin* was knocked down, revealing the essential roles of  
270 the two genes.

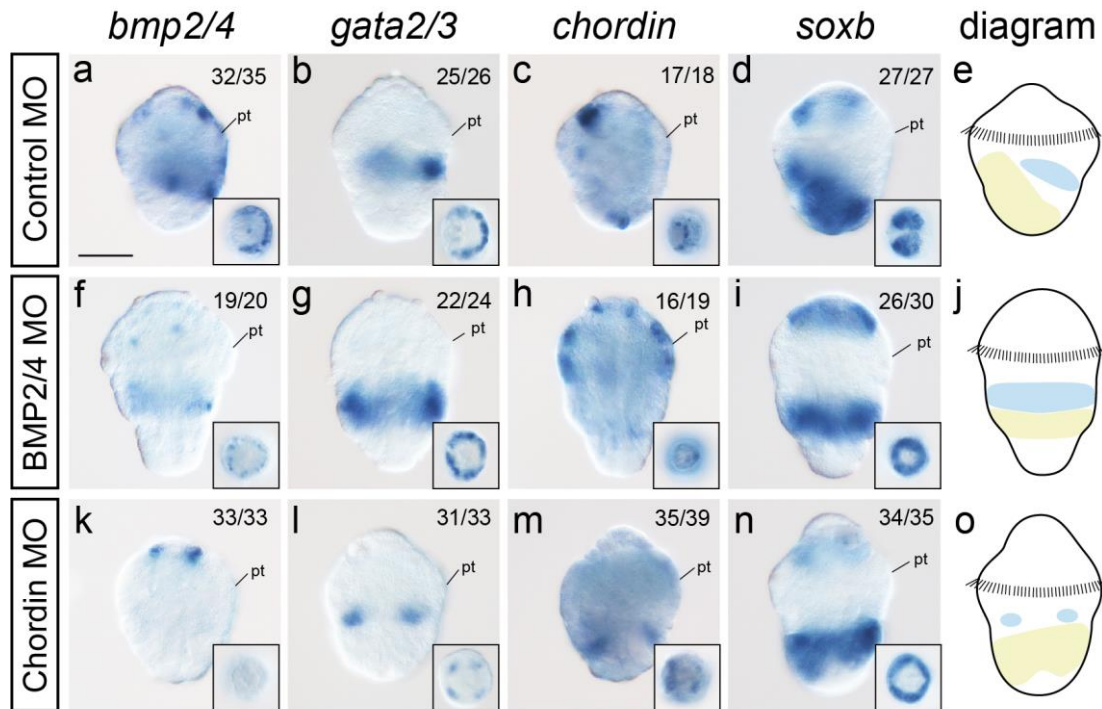

271

272 **Fig. 5 *bmp2/4* and *chordin* knockdown phenotypes at 6 hpf.** All panels are posterior views  
273 anterior to the top, and the inserts show posterior views. The diagrams are derived from the  
274 expression patterns of *gata2/3* (dorsal-type tissues) and *soxb* (ventral-type tissues). After  
275 knockdown of *bmp2/4* or *chordin*, these genes generally show radial expression. The dorsal- and  
276 ventral-type tissues were aligned along the AP axis in the influenced embryos. Notably, the  
277 expression of *chordin* and *soxb* in the *chordin*-knockdown embryo actually showed minor  
278 asymmetry at this stage (**m** and **n**). However, despite this, we think these embryos were  
279 comparable with the radialized phenotypes caused by *bmp2/4* knockdown (**f-i**) or rhBMP4 protein  
280 treatment (supplemental Fig. S6h-m). See more details in supplemental Fig. S5. pt, prototroch.  
281 Bars represent 50  $\mu$ m.

282 The expression levels of the marker genes in the *bmp2/4*- or *chordin*-knockdown  
283 embryos did not show a certain trend of changes, indicating inhibitory or promoting  
284 effects of BMP signaling. Although it seemed that BMP signaling inhibited *gata2/3*  
285 expression (Fig. 5g and l), it was difficult to conclude whether the expression levels of  
286 *soxb* were up- or downregulated in any groups (based on ISH; Fig. 5i and n).  
287 Similarly, no obvious trends of expression change were observed for *bmp2/4* or  
288 *chordin* themselves (Fig. 5f, h, k and m). Despite such uncertainty, a common



289 characteristic of the knockdown embryos was that the dorsal-type (*gata2/3*-positive)  
290 and ventral-type tissues (*soxb*-positive) were distributed along the AP axis (Fig. 5j and  
291 o), themselves showing radial organizations (inserts in Fig. 5f-i, k-n), reminiscent of  
292 the embryonic body pattern at the initial phase of DV patterning (Fig. 4k and l).  
293 Therefore, these knockdown phenotypes seem to indicate that the major role of the  
294 DV patterning signal (manifested by the BMP signaling gradient of early embryos) is  
295 to drive the dorsal/ventral-type tissues, which are anteriorly-posteriorly distributed  
296 initially, to move to their destined locations. When the BMP signaling gradient was  
297 eliminated, either by inhibition of signaling (*bmp2/4* knockdown) or generation of a  
298 universal distribution (*chordin* knockdown), the movement of the tissues was likely  
299 interrupted, producing the arrest of the “initial state” of the embryonic body plan.

300 Last, although a major role of BMP signaling is suggested to regulate cell  
301 movements, its roles in regulating cell specification are also suggested. Despite the  
302 largely circular organization of early *gata2/3* and *soxb* expression, asymmetry was  
303 detectable at early developmental stages (supplemental Fig. S4d'-i'). This result  
304 indicates that the initial dorsal/ventral-type tissues were not fully radial as in the  
305 influenced embryos and that BMP signaling indeed contributed to the specification of  
306 these tissues. Taken together, our results indicate that the DV patterning signal (the  
307 BMP signaling gradient) plays two roles in DV patterning: 1) it causes polarized  
308 specification of embryonic cells, though related tissues are still organized in a largely  
309 circular pattern, and 2) more importantly, it drives these tissues, which are distributed  
310 along the AP axis initially, to move to their destined locations along the DV axis.

### 311 *Reemerged asymmetrical development and posteriorized blastopore in late embryos*

312 A close look into the *chordin*-knockdown embryos actually revealed minor  
313 asymmetry (Fig. 5m and n), and we found that this asymmetry was significantly  
314 amplified in subsequent development. Somewhat unexpectedly, minor asymmetry  
315 also reemerged in the *bmp2/4*-knockdown embryos. For clarity, in the following text,  
316 we will describe the orientation of the manipulated embryos based on the locations of



317 3Q blastomeres (e.g., the 3B or 3D side) since normal DV patterning was influenced.  
318 In normal embryos, the 3B and 3D sides correspond to the ventral and dorsal sides,  
319 respectively (Fig. 4a).

320 At 8 hpf, the normal embryos had a well-developed DV axis (Fig. 6a-f). Due to  
321 the influence of DV patterning, the *bmp2/4*-knockdown embryos largely retained  
322 radial development (Fig. 6g-l and supplemental Fig. S7f-j). Only minor asymmetry  
323 was detected (e.g., polarized *chordin* expression; see Fig. 6i and supplemental Fig.  
324 S7i); we could not determine the direction of the asymmetry. In contrast,  
325 asymmetrical development in the *chordin*-knockdown embryos was much more  
326 evident (Fig. 6m-r and supplemental Fig. S7k-o). Such asymmetry occurred along the  
327 3B-3D axis (see supplemental Fig. S8 for details on the orientation of the manipulated  
328 embryos). In particular, in the posterior part of the embryo, the 3D side exhibited  
329 much greater development than the 3B side (red arrows in Fig. 6m-q), which showed  
330 *soxb* expression marking ventral-type tissues (Fig. 6o). The posterior tissues on the  
331 3D side were further divided into two bilateral lobes to make the embryo exhibit a  
332 pseudotwin phenotype (supplemental Fig. S7n and o). In a rare case, such a  
333 pseudotwin phenotype even developed duplicated larval shells (supplemental Fig.  
334 S9).

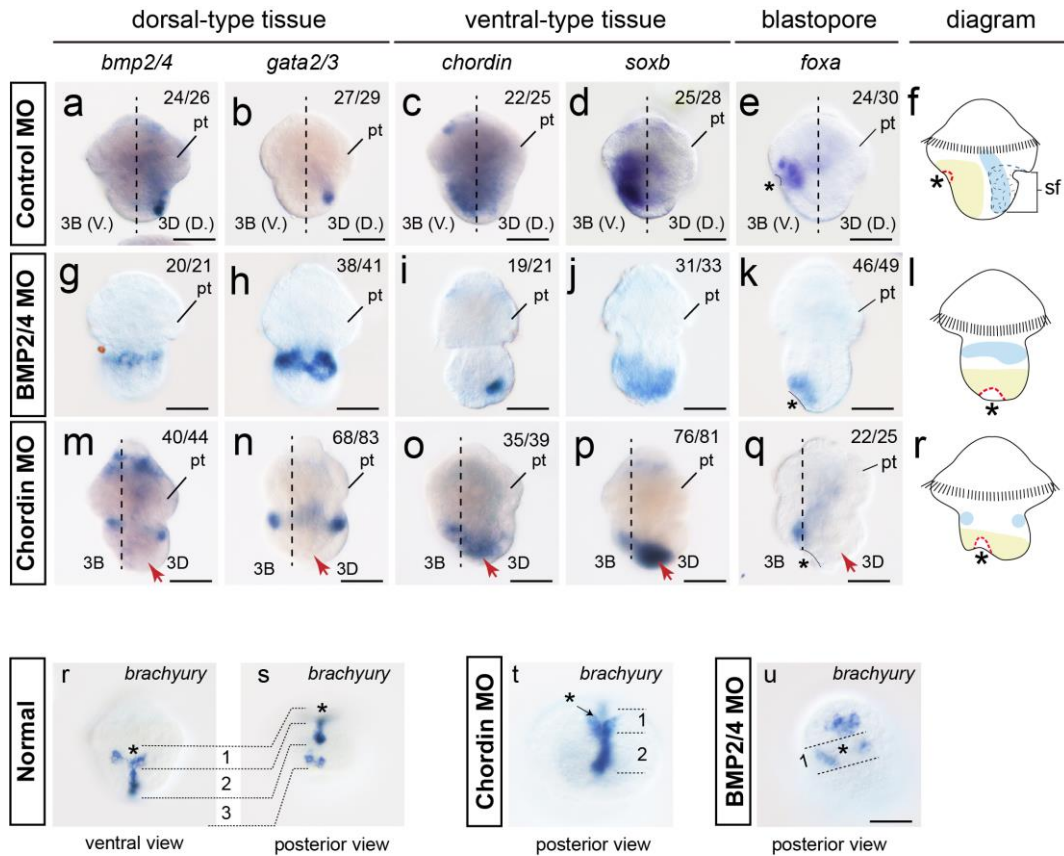

335

336 **Fig. 6** *bmp2/4* and *chordin* knockdown phenotypes at 8 hpf. Panels **a-r** show lateral views with  
 337 the 3B side to the left (when discriminable, indicated by dashed lines). The diagrams in **f, l** and **r**  
 338 show the body plans derived from the marker gene expression patterns shown in other panels.  
 339 Radial development was largely sustained in the *bmp2/4*-knockdown embryos (**g-k**), despite  
 340 polarized expression of *chordin* (**i**). However, evident asymmetry was observed for  
 341 *chordin*-knockdown embryos (red arrows in **m-q**), although the dorsal- and ventral-type tissues  
 342 were still generally distributed along the AP axis as the *bmp2/4*-knockdown embryos (**r** and **l**,  
 343 compare them to the 6-hpf embryos in Fig. 5). Expression of the blastopore marker *foxa* indicates  
 344 that locations of the blastopore (asterisks) are very different in normal embryos (**e**, ventral) and  
 345 manipulated embryos (**k** and **q**, posterior). See more details in supplemental Fig. S7. Panels **r-u**  
 346 shows *brachyury* expression at 8 hpf. At this stage, normal *brachyury* expression comprises three  
 347 parts (indicated by numbers in **r** and **s**; see the text for more information). After gene knockdown,  
 348 expression part 1 could be discriminated in both types of embryos (**t** and **u**), while expression part  
 349 2 was only observed in the *chordin*-knockdown embryo (**k**). The bars represent 50  $\mu$ m.

350 The blastopore was also formed in 8-hpf embryos. Notably, we found that the  
351 blastopore was posteriorized in both types of embryos (supplemental Fig. S7f and k),  
352 showing sharp contrast with the normal blastopore formed ventrally (supplemental  
353 Fig. S7a). The posteriorized blastopore was confirmed by the expression of the  
354 blastopore marker gene *foxa* (Fig. 6k and q, compared to the normal ventral  
355 expression shown in Fig. 6e). Such posteriorized blastopore is consistent with the fact  
356 that the influenced larval body plan exhibited tissues aligned along the AP axis (Fig.  
357 6l and r). In *L. goshimai*, the blastopore forms as a consequence of extensive cell  
358 movements during gastrulation (similar to *Patella* (43, 44)). Therefore, the changes in  
359 blastopore location in these manipulated embryos suggest altered cell movements  
360 during gastrulation, supporting our speculation that an essential role of the DV  
361 patterning signal is to regulate cell movement.

362 Since the posteriorized blastopore may have essential evolutionary implications,  
363 we sought to explore whether there was molecular evidence to indicate the  
364 developmental capacity of blastoporal cells, given that it was difficult to directly trace  
365 the development of the blastopore due to seriously disturbed development. To this end,  
366 we investigated the expression of another blastopore marker gene, *brachyury*, in the  
367 manipulated embryos. Similar to another gastropod (44), the normal *brachyury*  
368 expression of *L. goshimai* comprised three parts at 8 hpf (indicated by numbers in Fig.  
369 6r and s): 1) the posterior edge of blastopore, which showed a V shape and would  
370 contribute to the formation of larval mouth; 2) the ventral midline; and 3) posterior  
371 expression without determined fates. We found that in both *bmp2/4-* and  
372 *chordin*-knockdown embryos, although *brachyury* expression changed considerably, a  
373 V-shaped expression pattern was still discriminable in blastoporal cells (number “1”  
374 in Fig. 6t and u). This result indicates that despite the posteriorized localizations, the  
375 blastoporal cells seemed to still retain the developmental potential of the larval mouth  
376 in the manipulated embryos.

377 *Effects of BMP signaling on neurogenesis in L. goshimai*

378           There has been extensive evidence indicating the roles of the molluscan organizer  
379 in eye development, with some inconsistency among studies (31, 47-49). A recent  
380 study placed eye development into the context of neurogenesis and suggested a positive  
381 role of BMP signaling in neurogenesis of the gastropod mollusk *Tritia* (20). This effect,  
382 however, is opposite to nearly all other animals (50). We therefore investigated the  
383 relationship between BMP signaling and eye development/neurogenesis in *L. goshimai*.  
384 We found that, consistent with previous reports (20, 47, 48), BMP signaling (i.e., the  
385 inductive signals from the organizer) promoted eye development in *L. goshimai*: no eye  
386 formed after *bmp2/4* knockdown, and extra eyes formed under hyperactive BMP  
387 signaling when *chordin* was inhibited (Fig. 7a-c). rhBMP4 treatment also generated  
388 similar phenotypes (although a dose-dependent effect was indicated; see details in  
389 supplemental Fig. S6o'), which are comparable to that of a previous study (20).

390           However, subsequent analyses of neural marker genes did not support the  
391 proposal (20) that BMP signaling promotes neurogenesis. Although *chordin* inhibition  
392 expanded the expression of the neural patterning gene *pax6* in a portion of larvae (the  
393 arrow in Fig. 7f), *pax6* expression in the *chordin*-knockdown larvae exhibited  
394 considerable heterogeneity (Fig. 7f, i); thus, it was difficult to conclude a general  
395 pattern. Moreover, after *bmp2/4* knockdown, *pax6* expression did not show the  
396 expected downregulation (Fig. 7e, h). Therefore, *pax6* expression in the manipulated  
397 larvae did not suggest whether neurogenesis was promoted or inhibited by BMP  
398 signaling. Although expanded *pax6* expression in BMP4-treated *Tritia* larvae is  
399 considered an indicator of promoted neurogenesis (20), this result can also be  
400 interpreted to reflect the development of extra eyes given that *Tritia pax6* expression  
401 was mostly detected in the pretrichal region at the stage examined (20) and that we  
402 found that *pax6* expression in the pretrichal region showed an apparent correlation  
403 with the distributions of larval eyes (when BMP signaling was activated, compare Fig.  
404 7c and f).

405           Given that *pax6* might not be an appropriate marker for overall neurogenesis (it  
406 might only contribute to the development of subpopulations of neural tissues) and that  
407 the conserved roles of BMP signaling in neurogenesis may be detectable only in the  
408 early phase of neurogenesis (20), we analyzed two additional marker genes. Among  
409 them, *elav* is a universal neuron marker (51), and its expression pattern was proven to  
410 coincide with the distribution of neural tissues in a mollusk (52). The other marker gene,  
411 *soxb*, plays essential roles in the early phase of neurogenesis (53). *elav* expression was  
412 similar to that of *pax6* (Fig. 7j-l), and it is difficult to conclude whether neurogenesis is  
413 inhibited or promoted in any group. For *soxb*, we focused on its expression at the stage  
414 when gastrulation was just beginning (4 hpf). Neurogenesis should be in the early phase  
415 at this stage (featuring processes, such as definition of the neuroectoderm and  
416 commitment of neural stem cells). We found that although *soxb* expression indeed  
417 changed after inhibition of *bmp2/4* or *chordin* (supplemental Fig. S10b-g), it was not  
418 highest after *bmp2/4* knockdown or lowest after *chordin* knockdown (Fig. 7m-o),  
419 similar to the expression at 6 hpf. These results also did not indicate whether BMP  
420 signaling inhibits or promotes neurogenesis in *L. goshimai*.

421           Instead of indicating positive or inhibitory effects, our results suggest that BMP  
422 signaling seems to be irrelevant to neurogenesis per se but affects the organization of  
423 the nervous system. As revealed by both *pax6* and *elav* expression, a common  
424 phenotype after *bmp2/4* or *chordin* knockdown was the loss of featured bilaterally  
425 distributed neural tissues (Fig. 7g-l). In accordance, we found that although *soxb*  
426 expression showed a fully radial pattern under the high-dose rhBMP4 treatment  
427 (supplemental Fig. S6m), a bilateral pattern was restored in a portion of embryos when  
428 the treatment was weaker (supplemental Fig. S6m' and m'').

429

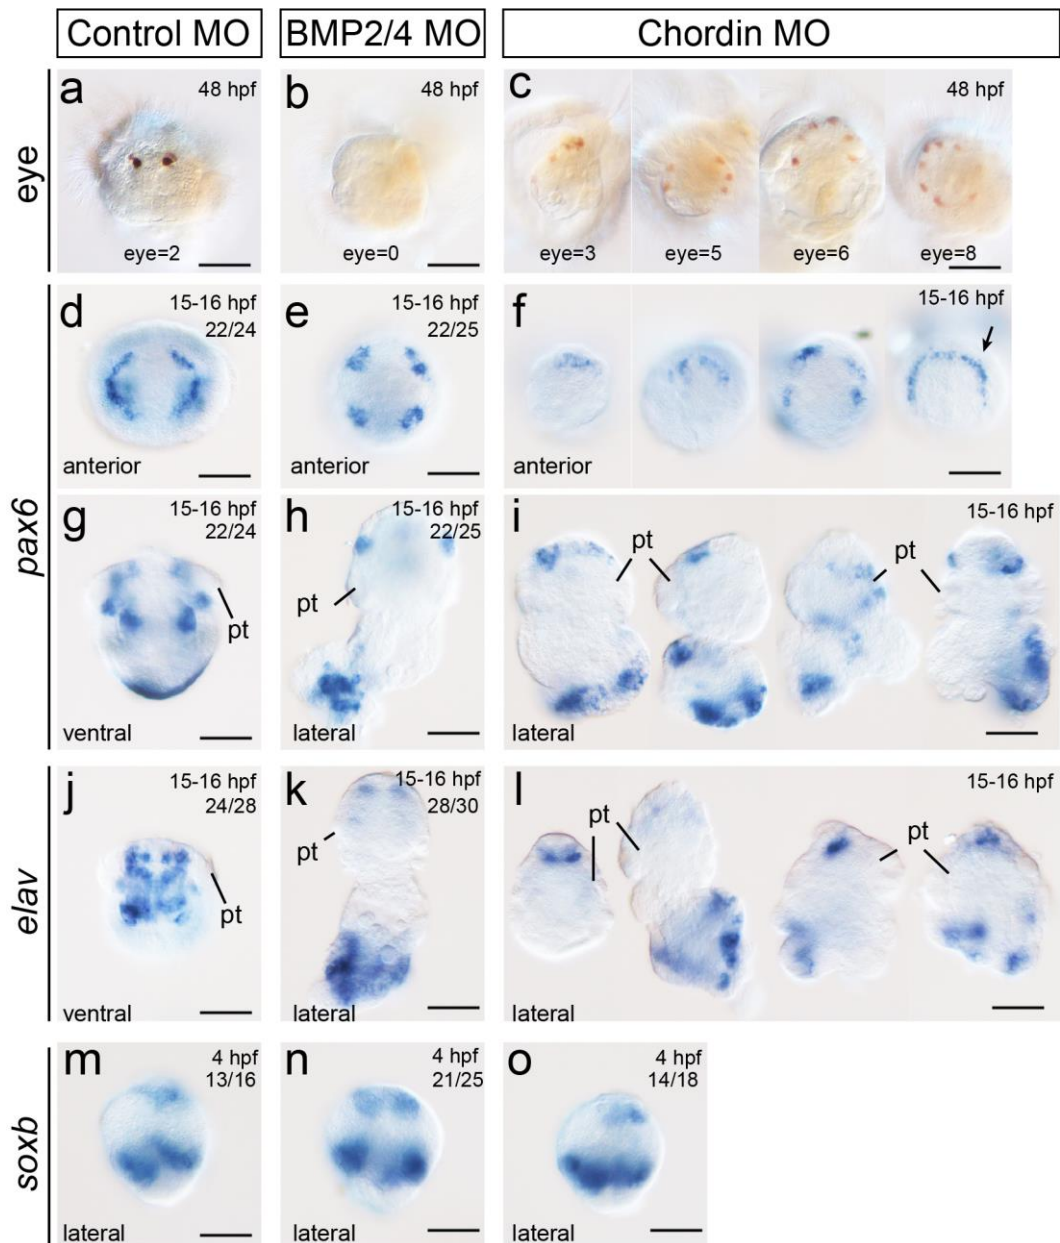

430

431 **Fig. 7 Effects of BMP signaling on eye formation and neurogenesis.** a-c. Anterior views  
 432 showing the eyes of 48-hpf larvae; a summary is shown in supplemental Fig. S10a. d-o.  
 433 Expression of the neural markers *pax6* and *elav* in larvae (15-16 hpf) and *soxb* expression in early  
 434 gastrulae (4 hpf). Since *pax6* and *elav* expression after *chordin* knockdown shows relatively high  
 435 levels of heterogeneity, representative larval phenotypes are provided (f, i and l), and it is not  
 436 possible to provide the number of individuals. Retrochordal *pax6* expression shows apparent  
 437 correlations with eye distribution (compare c and f); however, there is no one-to-one relationship  
 438 between the two panels. pt, prototroch. The bars represent 50  $\mu$ m. More details on early *soxb*  
 439 expression are provided in supplemental Fig. S10b-g.



## 440 **Discussion**

441 While the DV patterning mechanism is considered conserved across bilaterian  
442 clades (12), investigations on several spiralian representatives have revealed different  
443 results (13-18). Meanwhile, in various spiralian phyla, DV patterning is deeply  
444 integrated into a highly specialized organizer-driven developmental mode (23, 26-29),  
445 with the underlying molecular mechanism largely unknown. Together, these two lines  
446 of evidence indicate that spiralian DV patterning is essential to explore the  
447 conservation and plasticity of animal DV patterning and to decipher the molecular  
448 network underlying the spiralian D-quadrant organizer. In addition, as a crucial  
449 innovation at the origin of bilaterians, DV patterning affects crucial aspects of the  
450 bilaterian body plan (54, 55) and would have contributed to the flourishing of  
451 bilaterians since the Cambrian period. Given that the spiralian body plan has been  
452 suggested to be informative to infer the origin of bilaterians (56, 57), one can expect  
453 that investigations on spiralian DV patterning would reveal evidence indicating how  
454 the bilaterian body plan transits from that of its ancestor, which does not possess a DV  
455 axis.

456 In the present study, we explored the DV patterning of the mollusk *L. goshimai*;  
457 the major findings are presented in Fig. 8. We found that under the regulation of the  
458 D-quadrant organizer, a *bmp2/4-chordin*-based molecular network determined the  
459 BMP signaling gradient in very early embryos (approximately 60-cell stage, Fig. 8a).  
460 This gradient regulated DV patterning since early embryonic development was  
461 radialized when it was eliminated due to knockdown of *bmp2/4* or *chordin* (Fig. 8b).  
462 Examinations of influenced embryos further revealed correlations between the BMP  
463 signaling gradient (of early embryos) and the localization of blastopore and the  
464 organization of the larval nervous system, indicating regulatory effects of BMP  
465 signaling on the two essential tissues (Fig. 8b). The re-emerged asymmetry  
466 additionally indicated undetermined factors regulating polarized development along  
467 the 3B-3D axis that were independent of *bmp2/4* or *chordin* (Fig. 8b).

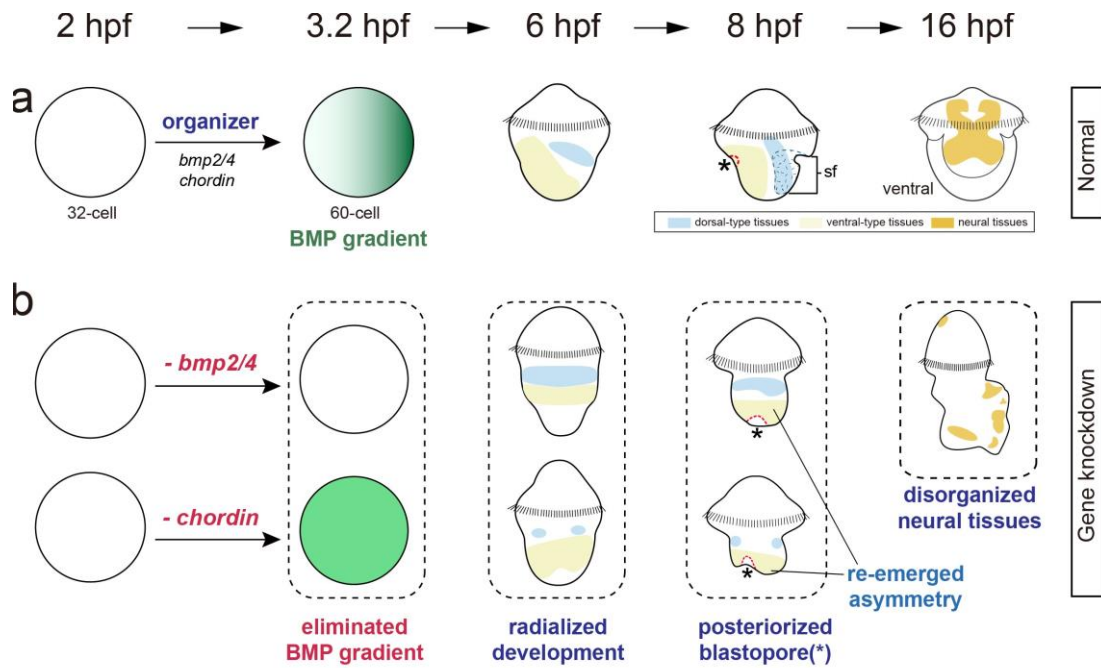

468

469 **Fig. 8 Schematic diagram showing the major findings of the present study.** Focusing on  
 470 *bmp2/4* and *chordin*, we revealed the roles of the two genes (i.e., BMP signaling) in organizer  
 471 function (Figs. 2 and 3) and DV patterning of the mollusk *L. goshimai* (Fig. 5). A close look at the  
 472 manipulated embryos revealed evidence showing the correlation between the BMP signaling  
 473 gradient and the localization of blastopore (Fig. 6) and likely the organization of neural tissues  
 474 (Fig. 7). Unexpected asymmetrical development re-emerged in the influenced embryos (Fig. 6).  
 475 See more information in the text.

476 *L. goshimai* DV patterning relies on *bmp2/4* and *chordin*

477 A major issue in the studies of spiralian DV patterning is that researchers have  
 478 reported very different results using different systems. Researchers concluded that  
 479 spiralian DV patterning relies on *bmp2/4* (without known roles of *chordin*) (19, 20),  
 480 other BMP ligand and antagonist (13), or even non-BMP signaling (14-18). Taken  
 481 together, a paradox rises: while it is widely accepted that the common ancestor of  
 482 bilaterians utilizes *bmp2/4* and *chordin* for DV patterning (12), this character is not  
 483 revealed in the six spiralian representatives spanning three spiralian phyla (three  
 484 annelids, two mollusks and one platyhelminth, Fig. 1a). This situation shows sharp  
 485 contrast to the broad conservation of the DV patterning mechanism in other animal

486 clades (1, 3, 5-7, 41). Here, we proved the roles of *bmp2/4* and *chordin* in DV  
487 patterning of the mollusk *L. goshimai* by showing that the knockdown of *bmp2/4* or  
488 *chordin* radialized early development (in 6-hpf embryos, Fig. 5). This result thus  
489 reveals a spiralian case retaining the conserved DV patterning mechanisms depending  
490 on *bmp2/4* and *chordin*, which is indicated but not revealed for a long time. Although  
491 this type of DV patterning mechanism has been revealed to be broadly conserved in  
492 most other animals, in the context of diverse reports on spiralian DV patterning, it  
493 conversely represents an unusual example. For other mollusks, a similar mechanism  
494 may be expected in the gastropod *Tritia* (20) and the bivalve *Crassostrea* (38, 39),  
495 given that current knowledge on their DV patterning mechanisms is consistent with a  
496 *bmp2/4-chordin*-based framework. Nevertheless, due to the very different  
497 experimental designs (see details below), we could not determine to what degree the  
498 differences between our conclusion and that in the gastropod *Crepidula* arguing no  
499 role of BMP signaling in DV patterning (14) would be explained by interspecies  
500 variations and the differences in experimental strategies.

501 After knockdown of DV patterning genes, dorsal/ventralization phenotypes are  
502 frequently observed in animals (e.g., *Drosophila*, vertebrates, hemichordates and  
503 echinoderms) (1, 3, 5, 41), including several spiralian (13, 19). However, *bmp2/4*- or  
504 *chordin*-knockdown phenotypes in *L. goshimai* showed relatively unusual  
505 characteristics. Despite the notably influenced cell specification, the major effect of  
506 gene knockdown is radialized development (Fig. 5), which we think is difficult to  
507 categorize as dorsal/ventralization. This result might be caused by technical reasons,  
508 e.g., the limited numbers of marker genes investigated. Indeed, a determined effect on  
509 tissue specification is suggested when taking *brachyury* expression into account.  
510 While some *brachyury* expression marked the ventral midline (Fig. 6r and s), we  
511 found that this part of *brachyury* expression was only retained in *chordin* knockdown  
512 embryos (Fig. 6t) but was undetectable when *bmp2/4* was inhibited (Fig. 6u). These  
513 results indicate the loss of the ventral midline in *bmp2/4*-knockdown embryos and

514 could be interpreted to be a trend of dorsalization. However, this effect was not  
515 observed for the major dorsal and ventral-type tissues, namely, the shell field  
516 (*gata2/3*-positive tissues) and ventral plate (*soxb*-positive tissues) (Fig. 6a-q). In fact,  
517 even though the role of BMP signaling on ventral midline development was  
518 determined, this effect in *L. goshimai* is opposite to the situation in the spider  
519 *Achaearanea*, in which a comparable dorsalization phenotype is obtained when  
520 *chordin* (*sog*) is knocked down (6). This paradox, however, is easy to explain when  
521 considering that the “ventral” midline tissue of *L. goshimai* is actually formed on the  
522 dorsal side at the initial phases of its development and moved to its destined location  
523 later (supplemental Fig. S8c-e). Taken together, the largely uninfluenced cell  
524 specification and, in contrast, greatly disturbed tissue distributions in the influenced  
525 embryos (Figs. 5 and 6) suggest that the major role of BMP signaling in *L. goshimai*  
526 is to break down radial symmetry and regulate the originally AP-aligned tissues to  
527 move to dorsal and ventral sides, which together result in the formation of the DV  
528 axis. Given that DV patterning coincides with epibolic gastrulation in *L. goshimai*, we  
529 propose that the DV patterning signal may perform its role by regulating cell  
530 movement during gastrulation.

531 A close look at previous reports reveals that although not emphasized, radialized  
532 development without a certain trend of dorsal/ventralization was indeed observed in  
533 some animals. In the spider *Achaearanea*, *bmp2/4* (*dpp*) knockdown resulted in  
534 radialized development in which the genes that were either activated (e.g., *fkf*) or  
535 inhibited (e.g., *twist*) in normal ventral tissues all exhibited radial expression (6). In  
536 the cnidarian *Nematostella*, *bmp2/4* or *chordin* knockdown caused radial expression  
537 of some BMP components, and more importantly, both abolished the expression of  
538 the gene normally expressed on the opposite side of *chordin* expression (7). In these  
539 two cases, BMP signaling does not simply inhibit or promote the expression of  
540 particular genes. In contrast, polarized gene expression seems to be detectable only  
541 when a correct BMP signaling gradient is available. Collectively, our results as well as

542 those previously reported suggest a role of BMP signaling in determining polarized  
543 distributions of gene expression without directly promoting or inhibiting the  
544 expression of the gene. In *L. goshimai*, this role seems to be achieved through  
545 regulating the movement of related cells; nevertheless, we do not suggest a similar  
546 process in *Achaearanea* or *Nematostella* given the insufficient details to reach a  
547 conclusion. Further investigations on additional species are necessary to explore the  
548 prevalence of this effect.

#### 549 *Insights into the suggested diversity of spiralian DV patterning mechanisms*

550 The very different reports in spiralian DV patterning undoubtedly suggest the  
551 diversity of the underlying mechanisms (13-20). However, it is notable that the  
552 experimental designs of these studies vary in many aspects: strategies to influence  
553 BMP signaling (MOs, small molecule inhibitors, exogenous BMP proteins), indicators  
554 of DV patterning (cell lineages, characteristic tissues, marker gene expression), and  
555 the developmental stages investigated (early embryos, larvae). Our results suggest that  
556 many of these factors would affect the results and may contribute to the differences in  
557 the conclusions.

558 One of our major findings is that the developmental stages investigated would be  
559 essential for the interpretations of the manipulated phenotypes. In *L. goshimai*, even  
560 though the developmental polarity was largely eliminated in early knockdown  
561 embryos (at 6 hpf, Fig. 5), asymmetrical development could re-emerge later (at 8 hpf,  
562 Fig. 6). In even later samples, some knockdown larvae exhibited a considerable  
563 degree of heterogeneity, and it was difficult to interpret whether and how DV  
564 patterning was influenced (e.g., at 15-16 hpf, shown Fig. 7). Such complicated  
565 phenotypes may be produced by the combined effects of influenced DV patterning,  
566 the amplification of disorganized early development (to varied degrees), etc. These  
567 results indicate that the effects on DV patterning may be underestimated if only a few  
568 or too late developmental stages were analyzed. Another difference among current  
569 studies is how researchers assess whether/how DV patterning is influenced. While cell

570 lineage analysis has been particularly useful in studying spiralian development (23, 24,  
571 26), the gene expression of particular blastomeres could be altered without detectable  
572 changes in cleavage patterns when influenced (e.g., *Tritia* Io2bRNA (20)). These data  
573 indicate that although cell lineage analysis is informative, gene expression data may  
574 be preferred when analyzing DV patterning. This strategy has also been widely used  
575 in DV patterning studies of many animals, including cnidarians, echinoderms and  
576 hemichordates (3, 7, 41).

577 The manners employed to influence BMP signaling would also be essential in  
578 studies on DV patterning. Given the extreme complexity of BMP signaling that  
579 includes multiple ligands and antagonists and is under tight temporal and spatial  
580 regulations (58, 59), manipulations on different nodes of the pathway could cause  
581 varied results. Indeed, we show that the phenotypes after *chordin* knockdown and  
582 rhBMP4 treatment somewhat differentiated from each other. Although they both  
583 caused enhanced BMP signaling and produced radialized development, only the  
584 *chordin*-knockdown embryos showed a posterior protrusion at 6 hpf (supplemental  
585 Figs. S5 and S6). Even radialized gene expression differed in the two groups: *chordin*  
586 knockdown caused circular *soxb* expression (Fig. 5n), and four symmetrical *soxb*  
587 expression was observed after treatment with 0.5  $\mu\text{g}/\text{ml}$  rhBMP4 (supplemental Fig.  
588 S6m). These differences may be caused by nodes of the signaling that were  
589 manipulated. Theoretically, *chordin* knockdown causes one inhibited antagonist  
590 (several other uninfluenced) but the uninfluenced ligand repertoire, while rhBMP4  
591 treatment results in one enhanced BMP ligand (still, several other uninfluenced) and  
592 the uninfluenced antagonist repertoire. Such differences in the nodes being  
593 manipulated may result in varied distributions and concentrations of BMP signaling,  
594 which would account for the differences between the resultant phenotypes. The  
595 complexity may further increase when considering that feedback effects exist between  
596 many nodes of the signaling pathway and that BMP signaling would function in  
597 multiple developmental processes (58, 59) (conversely, influenced DV patterning



598 under both manipulations suggests the crucial role of *bmp2/4* and *chordin* in DV  
599 patterning of *L. goshimai*). Similarly, it is reasonable to assume that *bmp2/4*  
600 knockdown (specific inhibition of one BMP ligand) and the treatment of small  
601 molecular inhibitors (inhibition of all BMP ligands in general) would result in varied  
602 states of BMP signaling.

603 Taken together, given the many factors that may influence studies on spiralian  
604 DV patterning, we suggest analyzing marker gene expression at multiple  
605 developmental stages of representative species (while cell lineage analysis is still an  
606 important aspect). The results obtained through different manipulations should be  
607 compared to discriminate the effects caused by the interference of DV patterning and  
608 other biological processes. These efforts will help to make a better comparison among  
609 the current studies and understand the inconsistencies in their conclusions.

#### 610 *DV patterning and the developmental mode in spiralian: organizer function and* 611 *stereotype cleavage*

612 A characteristic of spiralian DV patterning is that it depends on a D-quadrant  
613 organizer (26). The underlying molecular mechanisms of organizer function have  
614 received much attention (30-33, 37, 42, 60-62) but remain largely unknown. Although  
615 MAPK signaling is essential in organizer function (30, 31), the involved molecules  
616 are poorly understood. The demonstration of the involvement of *bmp2/4* in *Tritia*  
617 organizer function represents key progress toward an in-depth understanding of  
618 spiralian organizers (20). In the present study, we confirmed that *bmp2/4* played  
619 similar roles in *L. goshimai*, an equal cleaver, as its ortholog in the unequal cleaver  
620 *Tritia*. Although the manners of organizer activation and MAPK signaling dynamics  
621 would differ significantly between the two types of embryos (30, 31), the consistent  
622 employment of *bmp2/4* suggests a conserved molecular network underlying the  
623 organizer function of the two species. More importantly, we showed that after  
624 activation by the organizer, *bmp2/4* itself was not sufficient to establish the BMP  
625 signaling gradient in *L. goshimai* and that the formation of such a gradient required

626 asymmetrically expressed *chordin*. This result supports our speculation of the  
627 indispensable role of *chordin* in organizer function. Our hypothesis regarding the  
628 regulatory relationships among the organizer, *bmp2/4* and *chordin* (Fig. 3) suggests  
629 that the canonical DV patterning molecular network has been deeply integrated into  
630 organizer function in spiralian development, thus consolidating the link between a  
631 highly clade-specific character (a D-quadrant organizer) and a conserved biological  
632 process (DV patterning) (20). This hypothesis can be tested in more spiralian lineages,  
633 which would be important to understand the unique developmental mode in spiralian  
634 (25, 26, 63). Nevertheless, we want to express a cautious attitude to infer the  
635 conservation/prevalence of this BMP2/4-based organizer function given that BMP  
636 signaling has been suggested to have no roles in DV patterning in two annelids and a  
637 mollusk (14, 15, 17, 18).

638 As a part of its inductive effects, the organizer regulates subsequent cleavage  
639 patterns (36, 61). Indeed, the different division manners of 3q blastomeres (larger  
640  $3a/b^2$  on 3B side versus larger  $3c/d^1$  on 3D side) would be the first morphologically  
641 detectable polarity along the presumptive DV axis (36) (the 3B-3D polarity,  
642 supplemental Fig. S1d). This suggests that the highly stereotyped cleavage pattern  
643 may also participate in DV patterning. Intriguingly, although the BMP signaling  
644 gradient was eliminated when *bmp2/4* or *chordin* was knocked down, organizer  
645 formation and 3B-3D polarity in early embryos were not influenced (Fig. 2l and m).  
646 This provides an opportunity to explore the potential effects of this stereotype  
647 cleavage pattern. We detected asymmetry in late development of the manipulated *L.*  
648 *goshimai* embryos, which was along the 3B-3D axis in *chordin*-knockdown embryos  
649 (Fig. 5 & supplemental Fig. S5). Since 3B-3D polarity (supplemental Fig. S1d) would  
650 be the earliest and most evident polarity in the embryos, we propose that it may be  
651 related to late asymmetric development. This polarity may cause lineage-specific  
652 specifications (e.g., different fates of  $3a/b^2$  and  $3c/d^2$ ) or generate asymmetrical  
653 expression of other DV patterning genes on the 3B and 3D sides (e.g., *admp*, *tolloid*,

654 etc.). Further investigations are required to clarify which factor is at work or whether  
655 the two factors act in combination. In any case, the asymmetrical development in the  
656 knockdown embryos indicates the roles of the organizer independent of *bmp2/4* or  
657 *chordin* and suggests the profound effects of the stereotype cleavage pattern on the  
658 development of *L. goshimai*.

659 *Evolution of the bilaterian body plan: the likely common signal regulating DV*  
660 *patterning, blastopore localization and neurogenesis*

661 Bilaterians are phylogenetically close to cnidarians; it is suggested that the  
662 common ancestor of bilaterians exhibits a gastrula shape that shares many characters  
663 with extant cnidarians (55, 64). In particular, despite the tremendous variations, a  
664 generalized bilaterian possesses a DV axis, two digestive openings comprising a  
665 ventral mouth and a posterior anus, and a bilaterally organized nervous system. In  
666 contrast, their ancestor is suggested to lack a secondary axis and has a single  
667 anterior/posterior digestive opening and a radially organized nervous system.  
668 Obviously, the body plan of bilaterians experiences significant modifications  
669 compared to that of their ancestor. Several hypotheses suggest coordinated transitions  
670 of these structures during the early evolution of bilaterians, including innovation of  
671 the secondary axis, changes in digestive opening and formation of the directional,  
672 bilateral nervous system (54-57, 64). Nevertheless, it is unknown whether and how  
673 these transitions are coordinated at the molecular level. Our results show that these  
674 characteristics seem to be regulated by the same signal in *L. goshimai*, i.e., BMP  
675 signaling. We found that when signaling was influenced by knocking down *bmp2/4* or  
676 *chordin*, the embryos exhibited a body plan showing high similarities with the  
677 assumed bilaterian ancestor: no (or highly influenced) DV axis (radialized tissues  
678 distributed along the AP axis, Figs. 5 and 6), posteriorized blastopore (with the  
679 potential to develop to mouth, Fig. 6) and the lack of bilateral organization in the  
680 nervous system (likely in a radial pattern at early stages, as reflected by early *soxb*  
681 expression, Figs. 6 and 7). These results vaguely suggest that a common signal,

682 manifested by the BMP signaling gradient at early embryonic stages, may contribute  
683 to the coordinated transitions of multiple key characters during the early evolution of  
684 bilaterians. In *L. goshimai*, such coordination seems to be achieved by a common role  
685 of BMP signaling in regulating cell movement and thus tissue distribution, although  
686 the details are to be elucidated. It would be intriguing to explore whether the  
687 coordinated development of these essential characteristics exists in other animal  
688 lineages, especially some spiralian and deuterostome lineages whose larvae possess  
689 ventral mouth and bilateral nervous system (e.g., other mollusks, brachiopods,  
690 echinoderms and hemichordates). From an evolutionary perspective, the cooption of  
691 these processes may have enhanced the fitness of the bilaterian ancestor and thus  
692 facilitated its success.

## 693 **Material and Methods**

### 694 *Animals*

695 Adults of *L. goshimai* Nakayama, Sasaki & Nakano, 2017, were collected from  
696 intertidal rocks in Qingdao, China. Spawning occurred after collection during the  
697 reproductive season (from June to August). During other seasons, algae were scraped  
698 from the surfaces of rocks inhabited by the limpets and cultured on plastic sheets under  
699 constant light. At 18-22 °C, the limpets fed these cultured algae could become sexually  
700 mature in several weeks. On some occasions, spawning was induced through elevated  
701 temperature, drying, rigorous water flow or sperm suspensions. The adult limpets were  
702 allowed to spawn in separate 100-mL cups, and the gametes were collected. Artificial  
703 fertilization was performed by mixing sperm and oocyte suspensions.

704 Fertilized eggs were incubated in filtered seawater (FSW) containing antibiotics  
705 (100 unit/mL benzylpenicillin and 200 µg/mL streptomycin sulfate) in an incubator at  
706 25 °C. The units of all developmental stages are in hpf except for the very early  
707 developmental stages (before the 64-cell stage). For *in situ* hybridization (ISH),  
708 samples at the desired developmental stages were fixed in 4% paraformaldehyde (1 ×  
709 PBS, 100 mM EDTA, and 0.1% Tween-20, pH 7.4), transferred to methanol and stored

710 at -20 °C until use. Older larvae (after 15 hpf) were anesthetized with 0.1% sodium  
711 azide or 125 mM magnesium chloride before fixation. Analyses of the samples were  
712 performed as previously described, including ISH (46), pSmad1/5/8 staining (41),  
713 phalloidin staining (65) and scanning electron microscopy (SEM) (39).

#### 714 *Genes and MOs*

715 *L. goshimai* gene sequences were first retrieved from a developmental  
716 transcriptome that we developed previously (46), and the orthologies were verified  
717 through subsequent phylogenetic analyses (supplemental Figs. 11-16).  
718 Translation-blocking MOs targeting *bmp2/4* (*bmp2/4* MO) and *chordin* (*chordin* MO1),  
719 as well as two negative control MOs (a muted *chordin* MO (control MO1) and a  
720 standard MO (control MO2)), were synthesized (supplemental text). In preliminary  
721 experiments, we confirmed that the two negative control MOs did not generate any  
722 detectable effects on the development of *L. goshimai* at the concentrations we used.  
723 Therefore, muted *chordin* MO (control MO1) was used as the negative control MO in  
724 most experiments. We also used another nonoverlapping MO to inhibit the *chordin*  
725 gene (*chordin* MO2, see the supplemental text) and confirmed that it generated a  
726 similar phenotype to that when using *chordin* MO1.

#### 727 *MO microinjection*

728 Microinjection was performed using a micromanipulator. The injection solutions  
729 contained 0.05% phenol red, 500 ng/μL FITC-conjugated dextran and 0.25 mM MO.  
730 No more than 1.5% of the oocyte volume of the injection solution was injected into the  
731 unfertilized oocytes (estimated by the diameter of the injected solution). After  
732 fertilization, successful injections were confirmed by the presence of green  
733 fluorescence inside the cells; embryos that exhibited no fluorescence were removed. In  
734 trials aiming to explore pSmad1/5/8 distribution, FITC-conjugated dextran was  
735 excluded from the injection solution to avoid causing relatively high background values  
736 in subsequent immunostaining. On these occasions, the injections were performed  
737 slowly and carefully to ensure that every injection was successful.

738 *Treatments with rhBMP4 or U0126*

739 rhBMP4 (R&D Systems, USA; Cat. No. 314-BP) was resuspended in the  
740 suspending solution (0.2% BSA containing 4 mM HCl) at a concentration of 50 µg/mL  
741 and stored at -80°C according to the manufacturer's instructions. Two doses of  
742 treatments were conducted, as determined by preliminary experiments testing a series  
743 of treatment parameters. Specifically, rhBMP4 was added at a final concentration of 0.5  
744 µg/mL (the high-dose treatment) or 0.075 µg/mL (the low-dose treatment) immediately  
745 after fertilization, and the protein was eliminated from the culture system by three FSW  
746 washes at 6 hpf (supplemental Fig. S3). In the control groups, the same volume of  
747 suspending solution was added, and the same treatment time windows were used. The  
748 samples were collected at 6 hpf (for ISH) and 48 hpf (for investigations of eye  
749 development) before fixation.

750 U0126 (Beyotime, China; Cat. No. S1901) was dissolved in DMSO at a  
751 concentration of 25 mM and stored at -20 °C. At the 16-cell stage (approximately 1.7  
752 hpf), the U0126 storage solution was added to seawater to a final concentration of 75  
753 µM. In the control group, the same volume of DMSO was added. The embryos at the  
754 60- to 64-cell stage (approximately 3.5 hpf) were transferred to FSW followed by three  
755 FSW washes to terminate the treatment and were then collected and fixed.

756 Oocytes from at least three females were used in every assay involving  
757 rhBMP4/U0126 treatment or MO injection (ISH, immunostaining, eye number  
758 investigation, and SEM), and we confirmed that maternal effects did not evidently  
759 influence the outcomes of most experiments. Limited maternal effects were observed in  
760 the low-dose rhBMP4 treatment group. In these groups, the broods derived from  
761 approximately 10% females developed two eye as those in normal development,  
762 contrasting with the broods derived from other females in which multiple-eye larvae  
763 were consistently observed. The eye development of these broods appeared to be less  
764 sensitive than that of other broods to low-dose *bmp2/4* treatment; they were not  
765 included in the subsequent analysis.



766 *Imaging*

767 Images were recorded using a Nikon 80i microscope or an LSM 710  
768 laser-scanning confocal microscopy system (ZEISS, Germany). The contrast and  
769 brightness of the images were adjusted using Photoshop software; when performed,  
770 such adjustments were applied to the whole image rather than to any particular regions.

771 **Acknowledgments**

772 The authors are grateful to Dian-Han Kuo for engaging in thoughtful discussions  
773 throughout the course of the study and for critically revising the draft. The authors  
774 thank Menglu Cui for performing some ISH experiments, Bo Dong and Grigory  
775 Genikhovich for their discussions and comments on the draft, Ferdinand Marlétaz for  
776 providing the assembled transcriptomic data of various spiralian and for the helpful  
777 discussions, and Patrick Müller, Ulrich Technau and Lingyu Wang for their helpful  
778 discussions. This study was funded by the National Key R&D Program of China  
779 (2018YFD0900104) grant to P.H., the Marine S&T Fund of Shandong Province for  
780 Pilot National Laboratory for Marine Science and Technology (Qingdao)  
781 (2018SDKJ0302-1) grant to B.L., the China Agriculture Research System (CARS-49)  
782 grant to B.L., the National Natural Science Foundation of China (NO. 42076123 and  
783 31472265 grant to B.L. and NO. 41776157 grant to P.H.) and the Youth Innovation  
784 Promotion Association CAS (2018239) grant to P.H.

785 **Reference**

- 786 1. François V & Bier E (1995) *Xenopus chordin* and *Drosophila short gastrulation*  
787 genes encode homologous proteins functioning in dorsal-ventral axis formation. *Cell*  
788 80(1):19-20.
- 789 2. Hamada H, *et al.* (2009) Patterning of the dorsal-ventral axis in echinoderms:  
790 Insights into the evolution of the BMP-chordin signaling network. *PLoS Biology*  
791 7(11):e1000248-e1000248.
- 792 3. Lowe CJ, *et al.* (2006) Dorsoventral patterning in hemichordates: Insights into  
793 early chordate evolution. *PLoS Biology* 4(9):1603-1619.

- 794 4. Van der Zee M, Stockhammer O, von Levetzow C, Nunes da Fonseca R, & Roth  
795 S (2006) *Sog/Chordin* is required for ventral-to-dorsal Dpp/BMP transport and head  
796 formation in a short germ insect. *Proceedings of the National Academy of Sciences of*  
797 *the United States of America* 103(44):16307-16312.
- 798 5. Sasai Y, *et al.* (1994) *Xenopus chordin*: A novel dorsalizing factor activated by  
799 organizer-specific homeobox genes. *Cell* 79(5):779-790.
- 800 6. Akiyama-Oda Y & Oda H (2006) Axis specification in the spider embryo: *dpp* is  
801 required for radial-to-axial symmetry transformation and *sog* for ventral patterning.  
802 *Development* 133(12):2347-2357.
- 803 7. Saina M, Genikhovich G, Renfer E, & Technau U (2009) BMPs and Chordin  
804 regulate patterning of the directive axis in a sea anemone. *Proceedings of the National*  
805 *Academy of Sciences* 106(44):18592-18597.
- 806 8. DuBuc TQ, Ryan JF, & Martindale MQ (2019) “Dorsal–Ventral” genes are part of  
807 an ancient axial patterning system: Evidence from *Trichoplax adhaerens* (Placozoa).  
808 *Molecular Biology and Evolution* 36(5):966-973.
- 809 9. Genikhovich G, *et al.* (2015) Axis patterning by BMPs: Cnidarian network  
810 reveals evolutionary constraints. *Cell Reports* 10(10):1646-1654.
- 811 10. Patterson GI & Padgett RW (2000) TGF beta-related pathways. Roles in  
812 *Caenorhabditis elegans* development. *Trends in genetics : TIG* 16(1):27-33.
- 813 11. Lemaire P, Smith WC, & Nishida H (2008) Ascidiarians and the plasticity of the  
814 chordate developmental program. *Current Biology* 18(14):R620-R631.
- 815 12. Bier E & De Robertis EM (2015) BMP gradients: A paradigm for  
816 morphogen-mediated developmental patterning. *Science* 348(6242).
- 817 13. Kuo D-H & Weisblat DA (2011) A new molecular logic for BMP-mediated  
818 dorsoventral patterning in the leech *Helobdella*. *Current Biology* 21(15):1282-1288.
- 819 14. Lyons DC, Perry KJ, Batzel G, & Henry JQ (2020) BMP signaling plays a role in  
820 anterior-neural/head development, but not organizer activity, in the gastropod  
821 *Crepidula fornicata*. *Developmental Biology* 463(2):135-157.

- 822 15. Lanza AR & Seaver EC (2018) An organizing role for the TGF- $\beta$  signaling  
823 pathway in axes formation of the annelid *Capitella teleta*. *Developmental biology*  
824 435(1):26-40.
- 825 16. Lanza AR & Seaver EC (2020) Functional evidence that Activin/Nodal signaling  
826 is required for establishing the dorsal-ventral axis in the annelid *Capitella teleta*.  
827 *Development (Cambridge, England)* 147(18).
- 828 17. Lanza AR & Seaver EC (2020) Activin/Nodal signaling mediates dorsal-ventral  
829 axis formation before third quartet formation in embryos of the annelid *Chaetopterus*  
830 *pergamentaceus*. *EvoDevo* 11(1):1-17.
- 831 18. Webster NB, Corbet M, Sur A, & Meyer NP (2020) Role of BMP signaling  
832 during early development of the annelid *Capitella teleta*. *bioRxiv* (November).
- 833 19. Orii H & Watanabe K (2007) Bone morphogenetic protein is required for  
834 dorso-ventral patterning in the planarian *Dugesia japonica*. *Development, Growth &*  
835 *Differentiation* 49(4):345-349.
- 836 20. Lambert JD, Johnson AB, Hudson CN, & Chan A (2016) Dpp/BMP2-4 mediates  
837 signaling from the D-quadrant organizer in a Spiralian embryo. *Current Biology*  
838 26(15):2003-2010.
- 839 21. Kenny NJ, *et al.* (2014) The Lophotrochozoan TGF- $\beta$  signalling cassette -  
840 diversification and conservation in a key signalling pathway. *The International*  
841 *Journal of Developmental Biology* 58(6-7-8):533-549.
- 842 22. Erwin DH (2009) Early origin of the bilaterian developmental toolkit.  
843 *Philosophical Transactions of the Royal Society B: Biological Sciences*  
844 364(1527):2253-2261.
- 845 23. Lambert JD (2010) Developmental Patterns in Spiralian Embryos. *Current*  
846 *Biology* 20(2):R72-R77.
- 847 24. Seaver EC (2014) Variation in spiralian development: Insights from polychaetes.  
848 *International Journal of Developmental Biology* 58(6-8):457-467.
- 849 25. Henry JJ (2002) Conserved mechanism of dorsoventral axis determination in

- 850 equal-cleaving spiralian. *Developmental Biology* 248(2):343-355.
- 851 26. Henry JQ (2014) Spiralian model systems. *International Journal of*  
852 *Developmental Biology* 58(6-8):389-401.
- 853 27. Henry JJ & Martindale MQ (1999) Conservation and innovation in spiralian  
854 development. *Hydrobiologia* 402:255-265.
- 855 28. Hejnal A (2010) A twist in time-the evolution of spiral cleavage in the light of  
856 animal phylogeny. *Integrative and Comparative Biology* 50(5):695-706.
- 857 29. Nielsen C (2010) Some aspects of spiralian development. *Acta Zoologica*  
858 91(1):20-28.
- 859 30. Lambert JD & Nagy LM (2001) MAPK signaling by the D quadrant embryonic  
860 organizer of the mollusc *Ilyanassa obsoleta*. *Development (Cambridge, England)*  
861 128(1):45-56.
- 862 31. Lambert JD & Nagy LM (2003) The MAPK cascade in equally cleaving spiralian  
863 embryos. *Developmental Biology* 263(2):231-241.
- 864 32. Koop D, Richards GS, Wanninger A, Gunter HM, & Degnan BM (2007) The role  
865 of MAPK signaling in patterning and establishing axial symmetry in the gastropod  
866 *Haliotis asinina*. *Developmental Biology* 311(1):200-212.
- 867 33. Henry JJ & Perry KJ (2008) MAPK activation and the specification of the D  
868 quadrant in the gastropod mollusc, *Crepidula fornicata*. *Developmental Biology*  
869 313(1):181-195.
- 870 34. Garcia Abreu J, Coffinier C, Larraín J, Oelgeschläger M, & De Robertis EM  
871 (2002) Chordin-like CR domains and the regulation of evolutionarily conserved  
872 extracellular signaling systems. *Gene* 287(1-2):39-47.
- 873 35. Clement AC (1962) Development of *Ilyanassa* following removal of the D  
874 macromere at successive cleavage stages. *Journal Of Experimental Zoology*  
875 149(3):193-215.
- 876 36. van den Biggelaar JAM (1977) Development of dorsoventral polarity and  
877 mesentoblast determination in *Patella vulgata*. *Journal of Morphology*

- 878 154(1):157-186.
- 879 37. Guerrier P, van den Biggelaar JA, van Dongen CA, & Verdonk NH (1978)  
880 Significance of the polar lobe for the determination of dorsoventral polarity in  
881 *Dentalium vulgare* (da Costa). *Developmental biology* 63(1):233-242.
- 882 38. Tan S, Huan P, & Liu B (2018) An investigation of oyster TGF- $\beta$  receptor genes  
883 and their potential roles in early molluscan development. *Gene* 663(February):65-71.
- 884 39. Tan S, Huan P, & Liu B (2017) Expression patterns indicate that BMP2/4 and  
885 Chordin, not BMP5-8 and Gremlin, mediate dorsal-ventral patterning in the mollusk  
886 *Crassostrea gigas*. *Development Genes And Evolution* 227(2):75-84.
- 887 40. Wang YC & Ferguson EL (2005) Spatial bistability of Dpp-receptor interactions  
888 during *Drosophila* dorsal-ventral patterning. *Nature* 434(7030):229-234.
- 889 41. Lapraz F, Besnardeau L, & Lepage T (2009) Patterning of the dorsal-ventral axis  
890 in echinoderms: insights into the evolution of the BMP-chordin signaling network.  
891 *PLOS Biology* 7(11):e1000248.
- 892 42. van den Biggelaar JA & Guerrier P (1979) Dorsoventral polarity and  
893 mesentoblast determination as concomitant results of cellular interactions in the  
894 mollusk *Patella vulgata*. *Developmental biology* 68(2):462-471.
- 895 43. Lartillot N, Le Gouar M, & Adoutte A (2002) Expression patterns of *fork head*  
896 and *gooseoid* homologues in the mollusc *Patella vulgata* supports the ancestry of the  
897 anterior mesendoderm across Bilateria. *Development Genes And Evolution*  
898 212(11):551-561.
- 899 44. Lartillot N, Lespinet O, Vervoort M, & Adoutte A (2002) Expression pattern of  
900 *Brachyury* in the mollusc *Patella vulgata* suggests a conserved role in the  
901 establishment of the AP axis in Bilateria. *Development* 129(6):1411-1421.
- 902 45. Liu G, Huan P, & Liu B (2015) A GATA2/3 gene potentially involved in larval  
903 shell formation of the Pacific oyster *Crassostrea gigas*. *Development Genes And*  
904 *Evolution* 225(4):253-257.
- 905 46. Huan P, Wang Q, Tan S, & Liu B (2020) Dorsoventral decoupling of Hox gene

- 906 expression underpins the diversification of molluscs. *Proceedings of the National*  
907 *Academy of Sciences* 117(1):503-512.
- 908 47. Clement AC (1967) The embryonic value of the micromeres in *Ilyanassa*  
909 *obsoleta*, as determined by deletion experiments. I. The first quartet cells. *Journal of*  
910 *Experimental Zoology* 166(1):77-88.
- 911 48. Sweet HC (1998) Specification of first quartet micromeres in *Ilyanassa* involves  
912 inherited factors and position with respect to the inducing D macromere. *Development*  
913 125:4033-4044.
- 914 49. Goulding M (2003) Cell contact-dependent positioning of the D cleavage plane  
915 restricts eye development in the *Ilyanassa* embryo. *Development* 130(6):1181-1191.
- 916 50. Mizutani CM & Bier E (2008) EvoD/Vo: the origins of BMP signalling in the  
917 neuroectoderm. *Nature Reviews Genetics* 9(9):663-677.
- 918 51. Pascale A, Amadio M, & Quattrone A (2008) Defining a neuron: Neuronal ELAV  
919 proteins. *Cellular and Molecular Life Sciences* 65(1):128-140.
- 920 52. Fritsch M, Wollesen T, & Wanninger A (2016) Hox and ParaHox gene expression  
921 in early body plan patterning of polyplacophoran mollusks. *Journal of Experimental*  
922 *Zoology Part B: Molecular and Developmental Evolution* 326(2):89-104.
- 923 53. Hartenstein V & Stollewerk A (2015) The evolution of early neurogenesis.  
924 *Developmental Cell* 32(4):390-407.
- 925 54. Martindale MQ & Hejnol A (2009) A developmental perspective: changes in the  
926 position of the blastopore during bilaterian evolution. *Developmental Cell*  
927 17(2):162-174.
- 928 55. Arendt D, Tosches MA, & Marlow H (2016) From nerve net to nerve ring, nerve  
929 cord and brain-evolution of the nervous system. *Nature Reviews Neuroscience*  
930 17(1):61-72.
- 931 56. Nielsen C (2012) How to make a protostome. *Invertebrate Systematics*  
932 26(1):25-40.
- 933 57. Nielsen C (2018) Origin of the trochophora larva. *Royal Society Open Science*



934 5(7).

935 58. Massagué J (1998) TGF- $\beta$  SIGNAL TRANSDUCTION. *Annual Review of*  
936 *Biochemistry* 67(1):753-791.

937 59. Wu MY & Hill CS (2009) TGF- $\beta$  Superfamily Signaling in Embryonic  
938 Development and Homeostasis. *Developmental Cell* 16(3):329-343.

939 60. Henry JQ, Lyons DC, Perry KJ, & Osborne CC (2017) Establishment and activity  
940 of the D quadrant organizer in the marine gastropod *Crepidula fornicata*.  
941 *Developmental Biology* 431(2):282-296.

942 61. Kührtreiber WM, Til EH, & Dongen CAM (1988) Monensin interferes with the  
943 determination of the mesodermal cell line in embryos of *Patella vulgata*. *Roux's*  
944 *Archives of Developmental Biology* 197(1):10-18.

945 62. Kührtreiber WM, *et al.* (1986) The presence of an extracellular matrix between  
946 cells involved in the determination of the mesoderm bands in embryos of *Patella*  
947 *vulgata* (Mollusca, gastropoda). *Roux's Archives of Developmental Biology*  
948 195(4):265-275.

949 63. Seaver EC (2016) Annelid models I: *Capitella teleta*. *Current Opinion in*  
950 *Genetics and Development* 39:35-41.

951 64. Nielsen C, Brunet T, & Arendt D (2018) Evolution of the bilaterian mouth and  
952 anus. *Nature Ecology & Evolution* 2(9):1358-1376.

953 65. Kurita Y, Deguchi R, & Wada H (2009) Early Development and Cleavage Pattern  
954 of the Japanese Purple Mussel, *Septifer virgatus*. *Zoological Science* 26(12):814-820.

955
